# Supplementary material for: Association between metabolic syndrome and endometrial cancer risk: a systematic review and meta-analysis of observational studies
Source: publisher site journal article supplement (doi:10.18632/aging.103247), 2020-05-22
Supplement: Supplementary file [file aging-v12i10-103247-supplementary-material-SD2.pdf]

## SUPPLEMENTARY TABLES

**Supplementary Table 1. Outcomes and covariates of the studies included in the meta-analysis.**

| Study                      | Risk estimates (95% CI)                                                     | Adjustment factors                                                                                                                                                                                                                                                                                                                                                                                                                  |
|----------------------------|-----------------------------------------------------------------------------|-------------------------------------------------------------------------------------------------------------------------------------------------------------------------------------------------------------------------------------------------------------------------------------------------------------------------------------------------------------------------------------------------------------------------------------|
| Arthur et al. (2019)       | Age                                                                         | With the exception of the stratifying variable, models were adjusted for age, pack-years of smoking, alcohol intake, physical activity, hormone therapy use, oral contraceptive use, menopausal status, education, ethnicity, allocation to the observational study or intervention/placebo/control arm of each clinical trial                                                                                                      |
|                            | Smoking                                                                     |                                                                                                                                                                                                                                                                                                                                                                                                                                     |
|                            | Hormone therapy use                                                         |                                                                                                                                                                                                                                                                                                                                                                                                                                     |
|                            | Hormone therapy use (excluding women from the hormone therapy intervention) |                                                                                                                                                                                                                                                                                                                                                                                                                                     |
|                            | BMI                                                                         |                                                                                                                                                                                                                                                                                                                                                                                                                                     |
|                            | IDF                                                                         |                                                                                                                                                                                                                                                                                                                                                                                                                                     |
|                            | Modified NCEP ATP III (excluding WC)                                        |                                                                                                                                                                                                                                                                                                                                                                                                                                     |
|                            | NCEP ATP III                                                                |                                                                                                                                                                                                                                                                                                                                                                                                                                     |
|                            | IDF                                                                         |                                                                                                                                                                                                                                                                                                                                                                                                                                     |
|                            | Endometrioid grade 1-2                                                      |                                                                                                                                                                                                                                                                                                                                                                                                                                     |
| Trabert et al. (2015)      | Endometrioid grade 3                                                        | Diagnosis date, age, race/ethnicity, registry area, tobacco use, and additionally adjusted for overweight/obesity for all cases                                                                                                                                                                                                                                                                                                     |
|                            | Adenocarcinoma                                                              |                                                                                                                                                                                                                                                                                                                                                                                                                                     |
|                            | Serous                                                                      |                                                                                                                                                                                                                                                                                                                                                                                                                                     |
|                            | Clear cell                                                                  |                                                                                                                                                                                                                                                                                                                                                                                                                                     |
|                            | Mucinous                                                                    |                                                                                                                                                                                                                                                                                                                                                                                                                                     |
|                            | Carcinosarcoma                                                              |                                                                                                                                                                                                                                                                                                                                                                                                                                     |
|                            | Sarcoma                                                                     |                                                                                                                                                                                                                                                                                                                                                                                                                                     |
|                            | Other                                                                       |                                                                                                                                                                                                                                                                                                                                                                                                                                     |
|                            | IDF                                                                         |                                                                                                                                                                                                                                                                                                                                                                                                                                     |
|                            | Pre/perimenopausal                                                          |                                                                                                                                                                                                                                                                                                                                                                                                                                     |
| Friedenreich et al. (2011) | Harmonized definition                                                       | Age, age at menarche, number of pregnancies $\geq$ 20 weeks gestation<br>Age, age at menarche, number of pregnancies $\geq$ 20 weeks gestation, hormone therapy use type<br>Age, age <sup>2</sup> , age at menarche, number of pregnancies $\geq$ 20 weeks gestation, hormone therapy use type<br>Age, age at menarche, number of pregnancies $\geq$ 20 weeks gestation, hormone therapy use type, adiponectin, insulin, and leptin |
|                            | NCEP ATP III                                                                |                                                                                                                                                                                                                                                                                                                                                                                                                                     |
|                            | IDF                                                                         |                                                                                                                                                                                                                                                                                                                                                                                                                                     |
|                            | modified IDF (WC $\geq$ 88cm)                                               |                                                                                                                                                                                                                                                                                                                                                                                                                                     |
|                            | BMI < 25                                                                    |                                                                                                                                                                                                                                                                                                                                                                                                                                     |
|                            | BMI > 30                                                                    |                                                                                                                                                                                                                                                                                                                                                                                                                                     |
